# Supplementary figures and images for: Core/shell iron/iron oxide nanoparticles: are they promising for magnetic hyperthermia?
Source: Royal Society of Chemistry journal article supplement (doi:10.1039/c6ra05064f), 2016-01-01

## Supplementary Information

Size distribution for 8, 12, 14 nm C/S and 10, 14, 18 nm hollow nanoparticles.

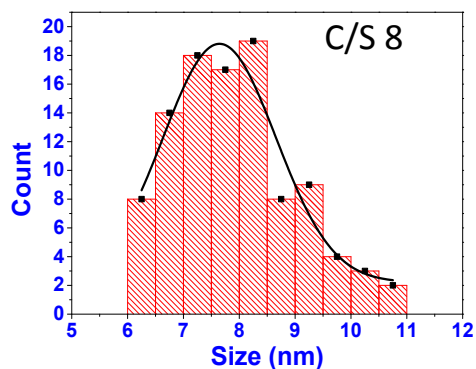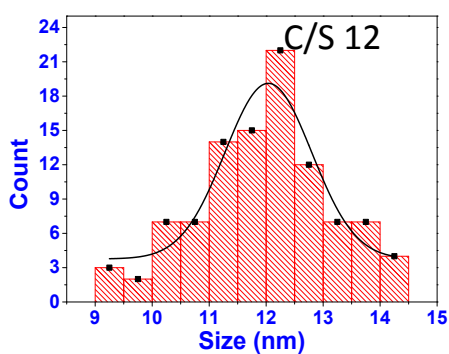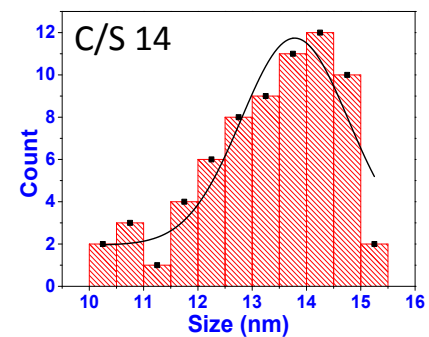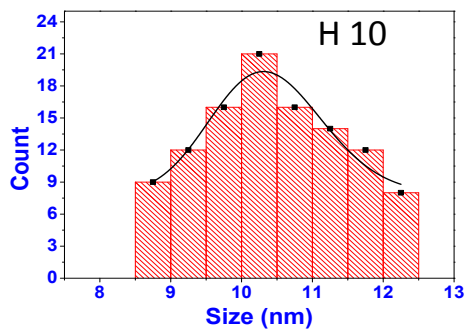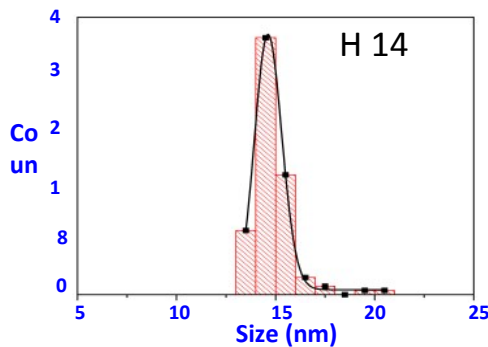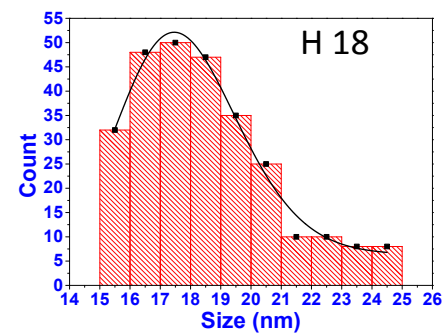

Supplement: c6ra05064f1.pdf [file c6ra05064f1.pdf]
